# Supplementary material for: trans-Dichloro(triphenylarsino)(N,N-dialkylamino)platinum(II) Complexes: In Search of New Scaffolds to Circumvent Cisplatin Resistance
Source: MDPI journal article supplement (doi:10.3390/molecules27030644), 2022-01-19
Supplement: s1 [file s1]

## Supplementary Materials

# ***trans*-Dichloro(triphenylarsino)(*N,N*-dialkylamino)platinum(II) Complexes: In Search of New Scaffolds to Circumvent Cisplatin Resistance**

Mariafrancesca Hyeraci <sup>1,†</sup>, Laura Agnarelli <sup>2,†</sup>, Luca Labella <sup>2,3</sup>, Fabio Marchetti <sup>2</sup>, Maria Luisa Di Paolo <sup>4</sup>, Simona Samaritani <sup>2,3</sup> and Lisa Dalla Via <sup>1,\*</sup>

<sup>1</sup> Department of Pharmaceutical and Pharmacological Sciences, Università degli Studi di Padova, Via F. Marzolo, 5, 35131 Padova, Italy; mariafrancesca.hyeraci@studenti.unipd.it (M.H.); lisa.dallavia@unipd.it (L.D.V.)

<sup>2</sup> Department of Chemistry and Industrial Chemistry, University of Pisa, Via G. Moruzzi 13, 56124 Pisa, Italy; laura.agnarelli@cpfs.mpg.de (L.A.); luca.labella@unipi.it (L.L.); fabio.marchetti1950@unipi.it (F.M.); simona.samaritani@unipi.it (S.S.)

<sup>3</sup> CISUP-Center for the Integration of Scientific Instruments, University of Pisa, 56126 Pisa, Italy  
<sup>4</sup> Department of Molecular Medicine, Università degli Studi di Padova, Via G. Colombo, 3, 35131 Padova, Italy; marialuisa.dipaolo@unipd.it

\* Correspondence: lisa.dallavia@unipd.it; Tel.: +39-049-8275712

† These authors contributed equally to this work.

Figure S1. <sup>1</sup>H NMR spectrum of *cis,trans*-[PtCl<sub>2</sub>(AsPh<sub>3</sub>)(NCMe)].

Figure S2. <sup>195</sup>Pt NMR spectrum of *cis,trans*-[PtCl<sub>2</sub>(AsPh<sub>3</sub>)(NCMe)].

Figure S3. <sup>1</sup>H NMR spectrum of **1**.

Figure S4. <sup>13</sup>C NMR spectrum of **1**.

Figure S5. <sup>195</sup>Pt NMR spectrum of **1**.

Figure S6. <sup>1</sup>H NMR spectrum of **2**.

Figure S7. <sup>13</sup>C NMR spectrum of **2**.

Figure S8. <sup>195</sup>Pt NMR spectrum of **2**.

Figure S9. <sup>1</sup>H NMR spectrum of **1** in DMSO-d<sub>6</sub> solution after 24 h. Aromatic portion is omitted.

Figure S10. Dot plots from a representative experiment of A2780cis cells incubated with complex **1** and loaded with JC-1. A2780cis cells were incubated for 40 h with complex **1** or cisplatin (cisPt) at indicated concentrations. Percentages of cells with high (Q2) and low (Q4) mitochondrial membrane potential, are reported.

Figure S11. Dot plots from a representative experiment of A2780 cells incubated with complex **1** and loaded with JC-1. A2780 cells were incubated for 40 h with complex **1** at 5 μM concentration. Percentages of cells with high (Q2) and low (Q4) mitochondrial membrane potential, are reported.

Figure S12. Dot plots from a representative experiment of A2780cis cells incubated with complex **1** and loaded with Annexin V-FITC and propidium iodide. A2780cis cells were incubated for 40 h with complex **1** at indicated concentrations. Percentages of viable (Q3), apoptotic (Q2+Q4) and necrotic (Q1) A2780cis are reported.

Figure S13. Dot plots from a representative experiment of A2780 cells incubated with complex **1** and loaded with Annexin V-FITC and propidium iodide. A2780 cells were incubated for 40 h with complex **1** at 10<sup>-6</sup> M concentration. Percentages of viable (Q3), apoptotic (Q2+Q4) and necrotic (Q1) A2780cis are reported.

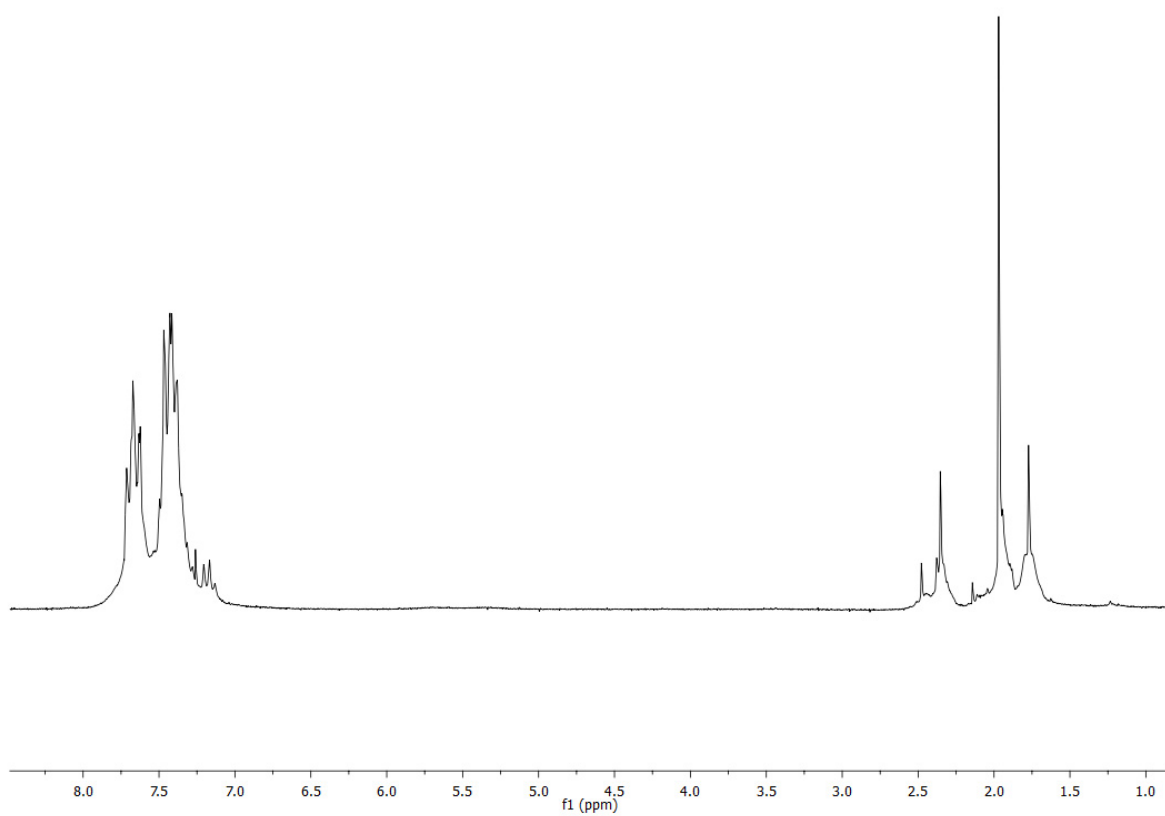

**Figure S1.**  $^1\text{H}$  NMR spectrum of *cis,trans*-[PtCl<sub>2</sub>(AsPh<sub>3</sub>)(NCMe)].

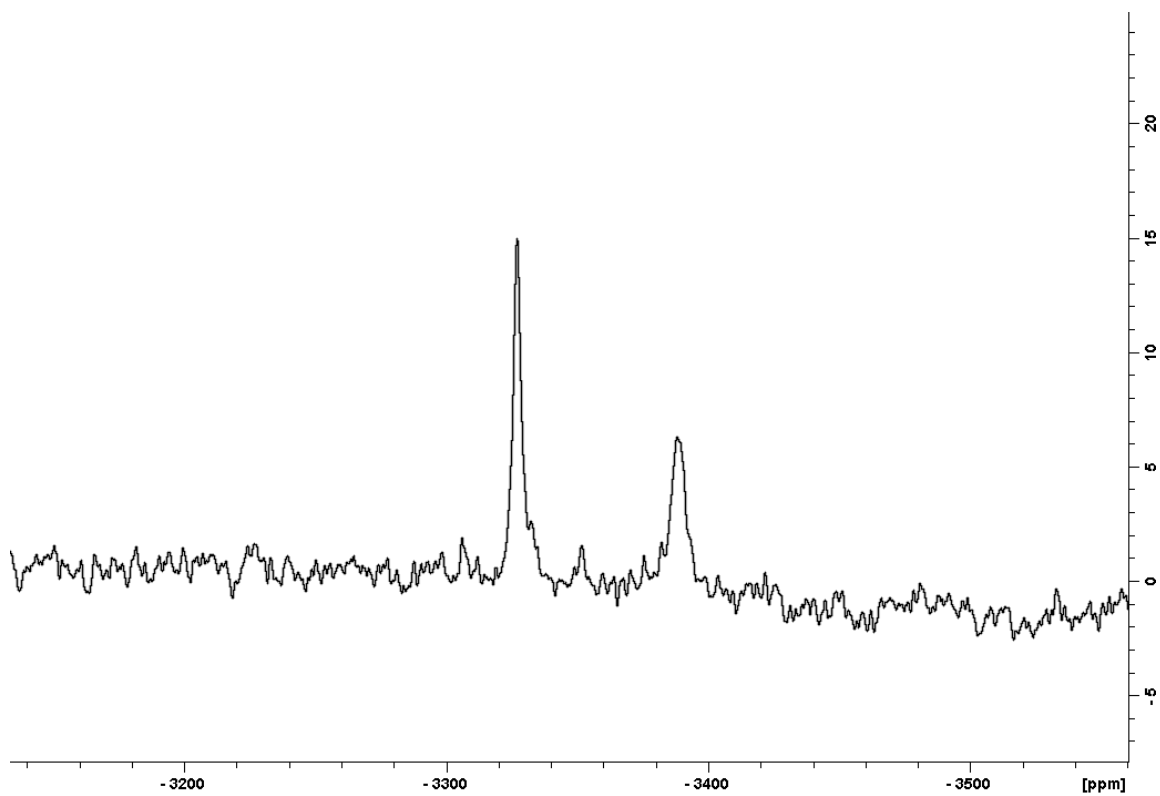

**Figure S2.**  $^{195}\text{Pt}$  NMR spectrum of *cis,trans*-[PtCl<sub>2</sub>(AsPh<sub>3</sub>)(NCMe)].

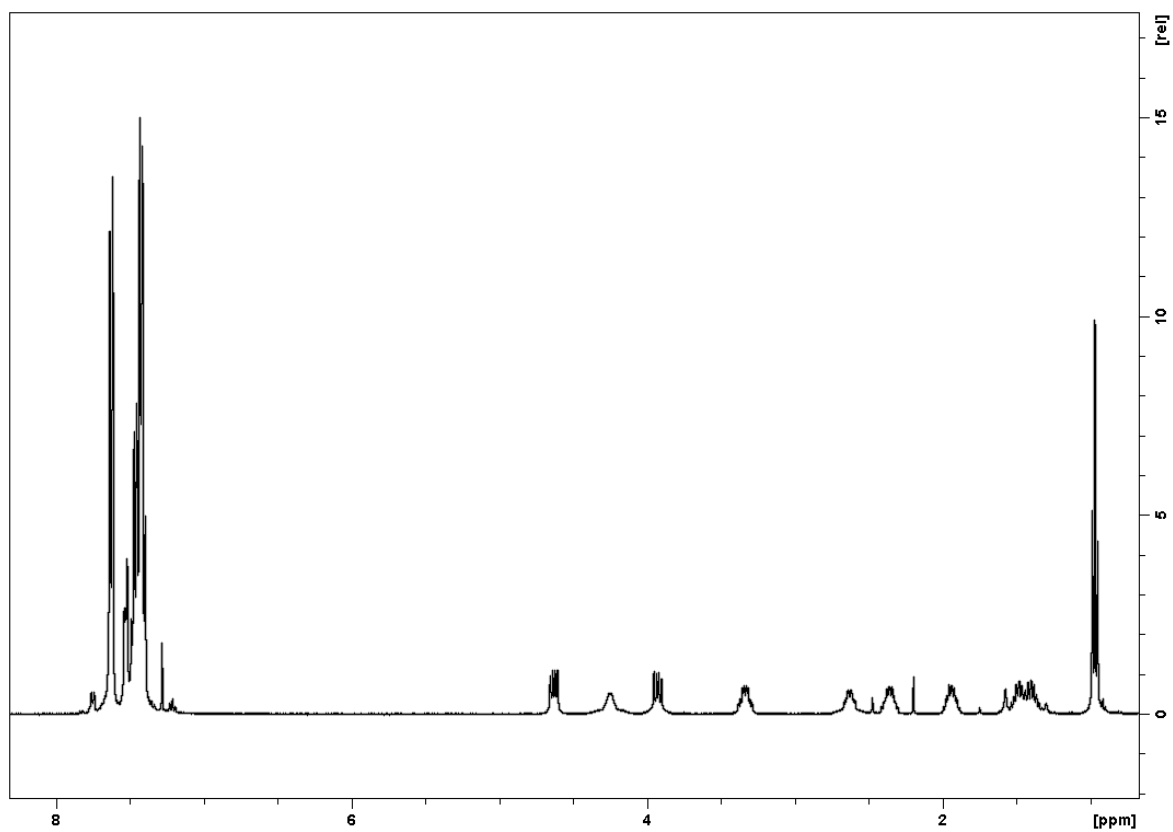

**Figure S3.**  $^1\text{H}$  NMR spectrum of **1**.

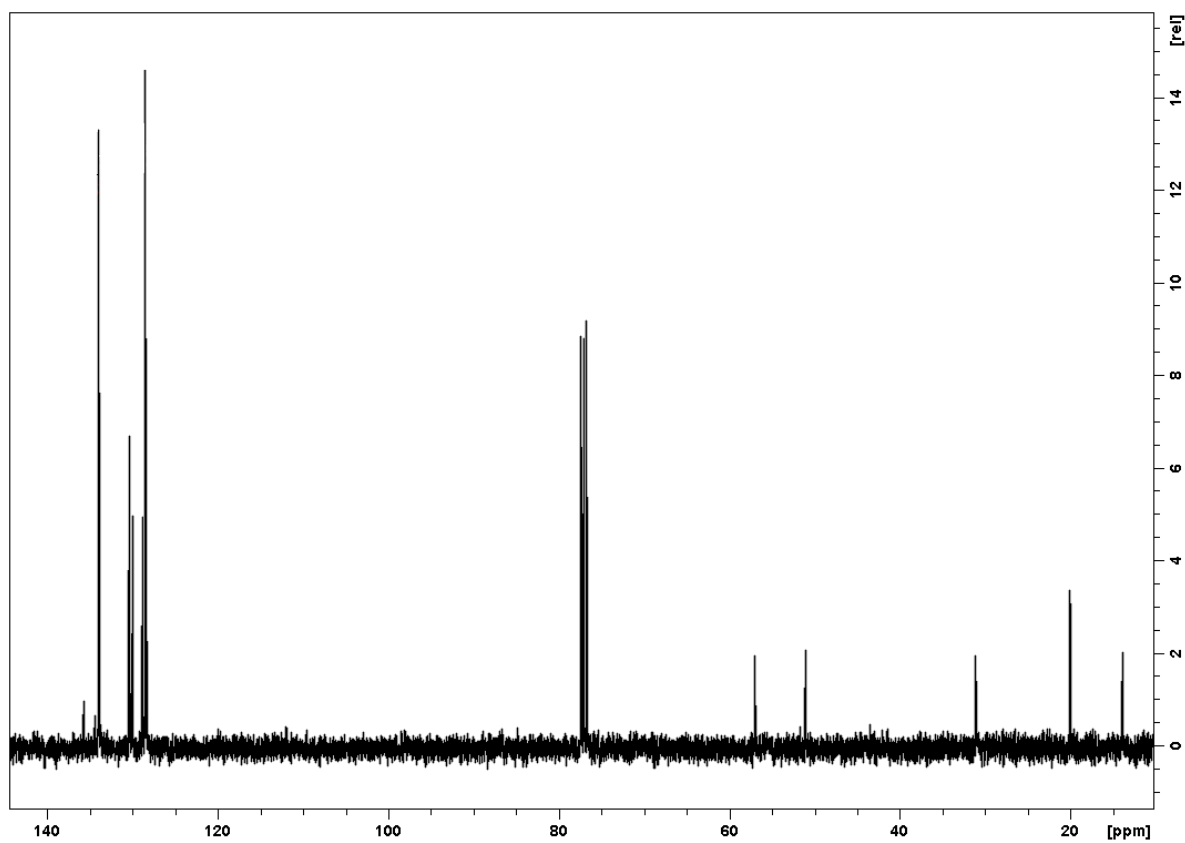

**Figure S4.**  $^{13}\text{C}$  NMR spectrum of **1**.

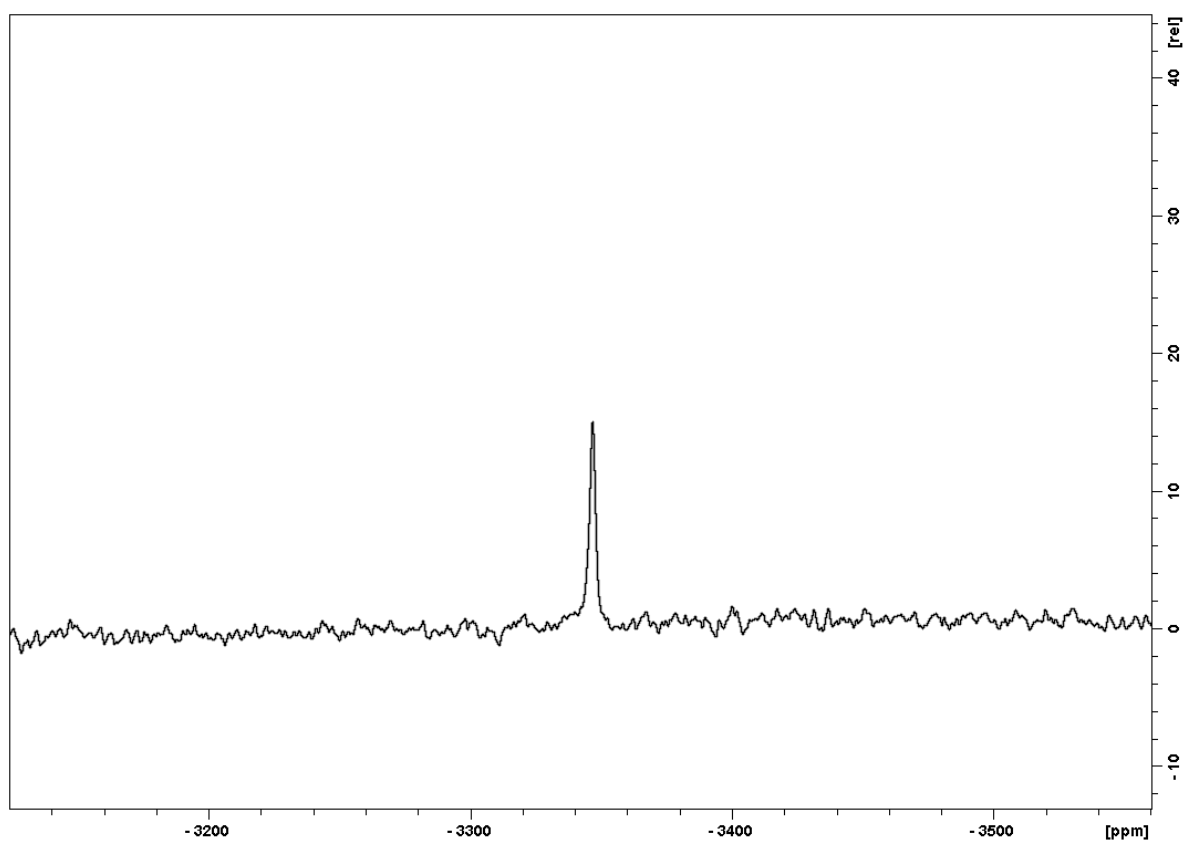

Figure S5.  $^{195}\text{Pt}$  NMR spectrum of **1**.

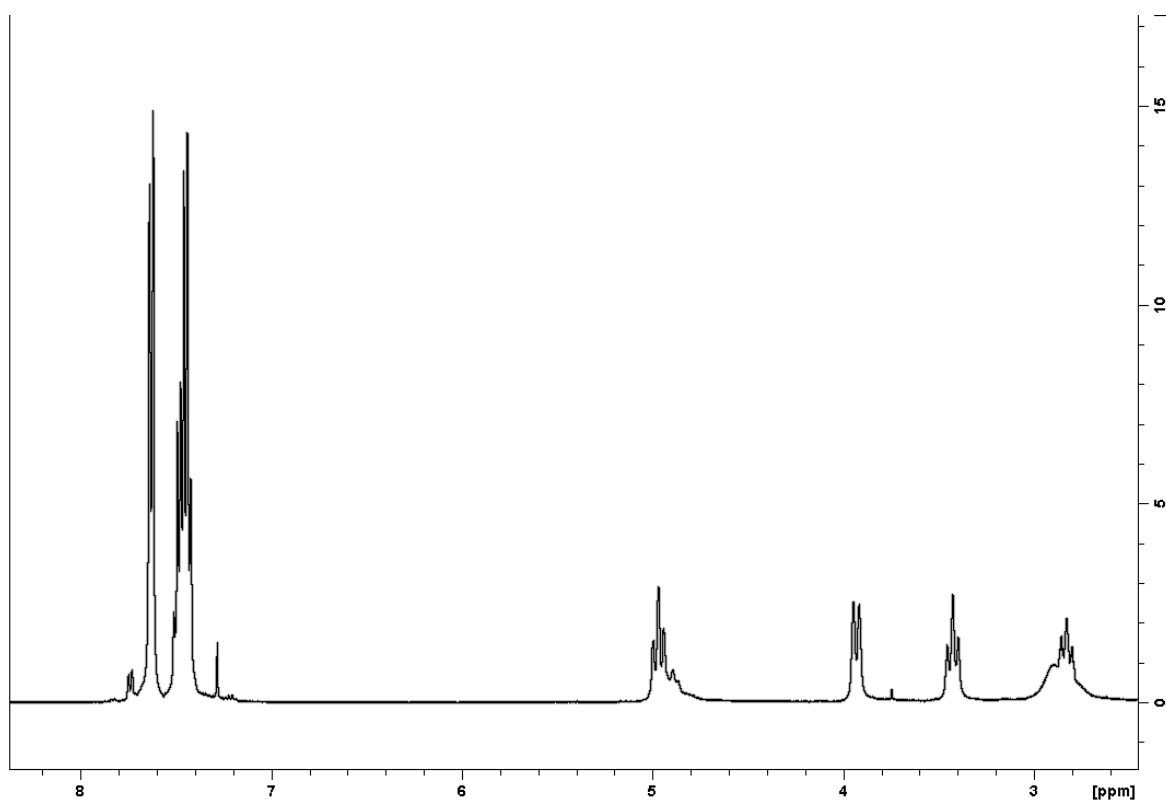

Figure S6.  $^1\text{H}$  NMR spectrum of **2**.

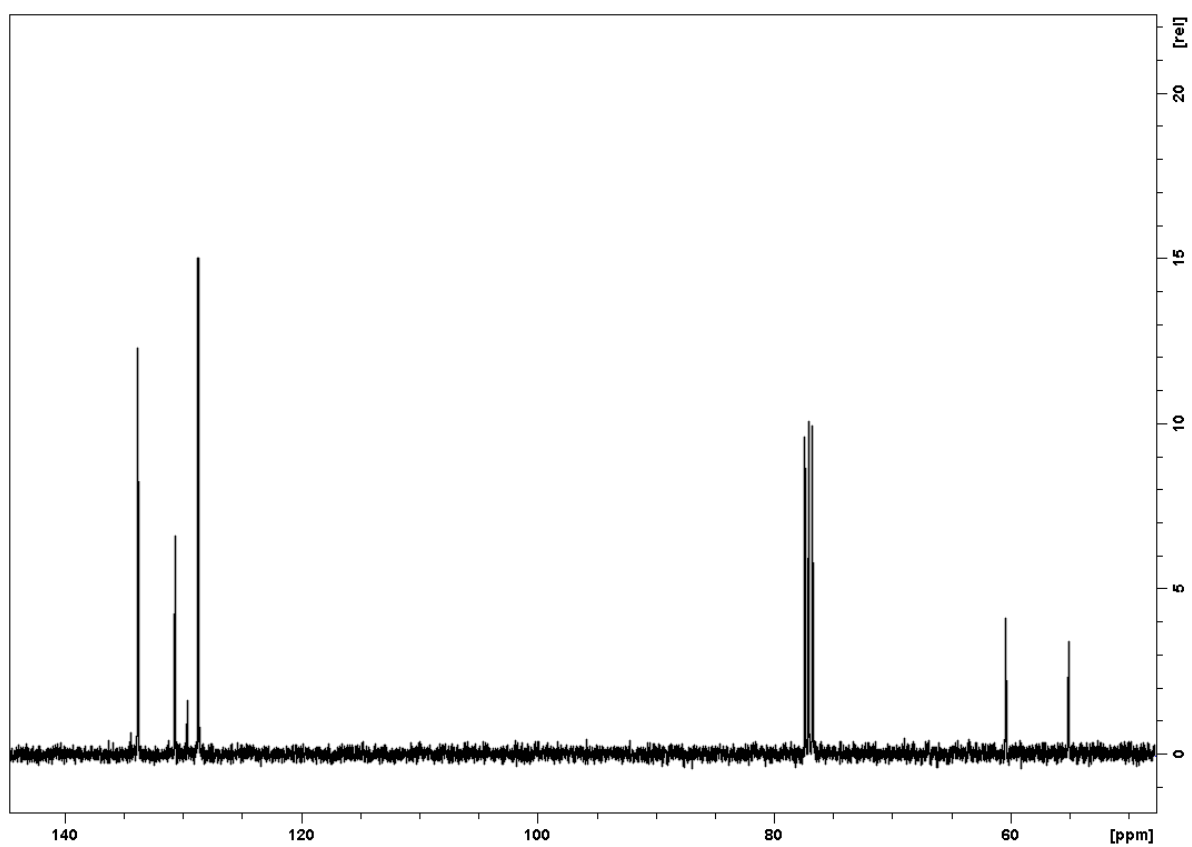

Figure S7.  $^{13}\text{C}$  NMR spectrum of 2.

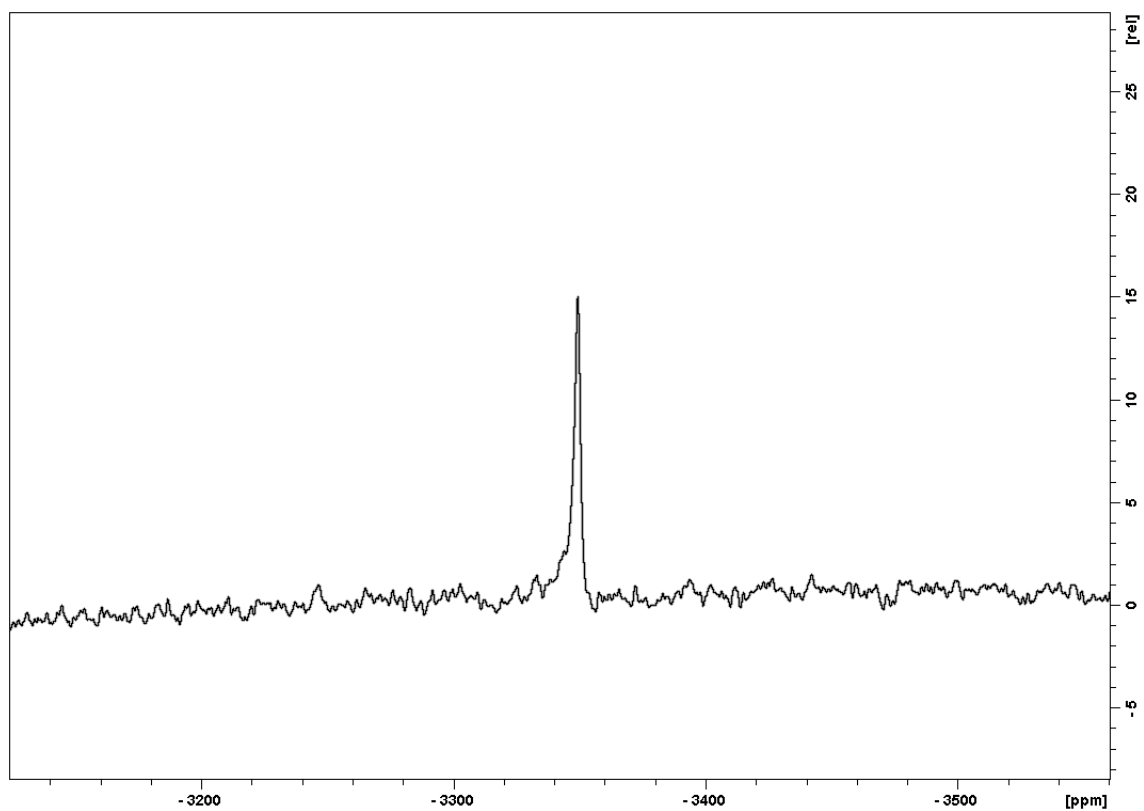

Figure S8.  $^{195}\text{Pt}$  NMR spectrum of 2.

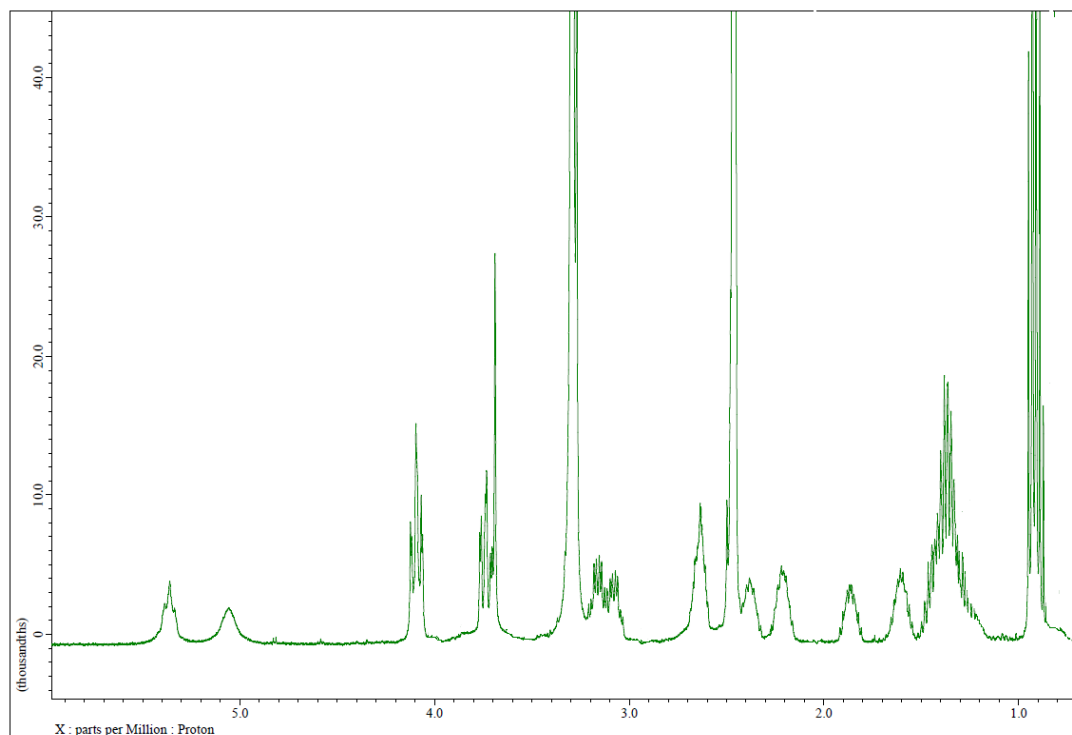

**Figure S9.**  $^1\text{H}$  NMR spectrum of **1** in DMSO- $d_6$  solution after 24 h. Aromatic portion is omitted.

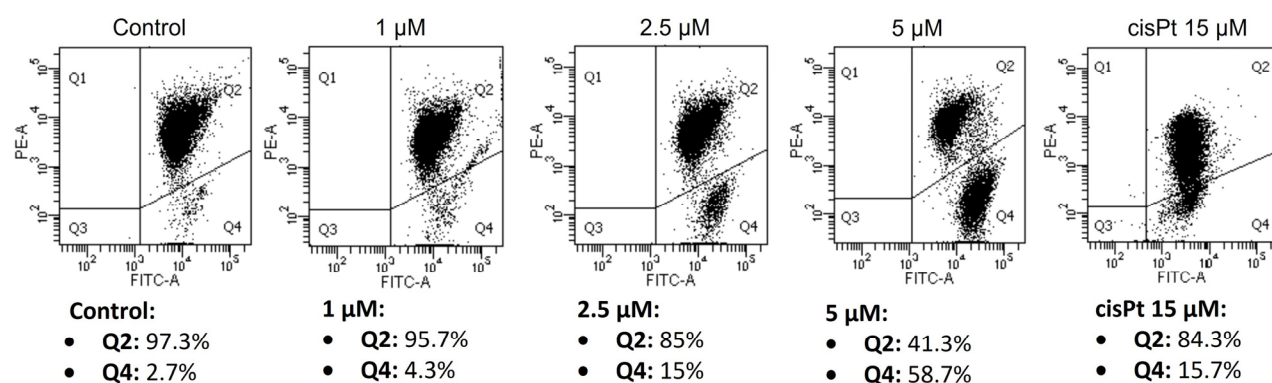

**Figure S10.** Dot plots from a representative experiment of A2780cis cells incubated with complex **1** and loaded with JC-1. A2780cis cells were incubated for 40 h with complex **1** or cisplatin (cisPt) at indicated concentrations. Percentages of cells with high (Q2) and low (Q4) mitochondrial membrane potential, are reported.

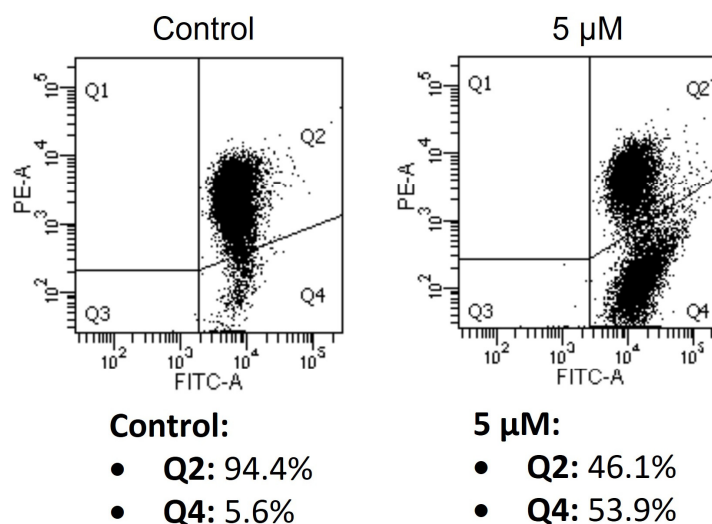

**Figure S11.** Dot plots from a representative experiment of A2780 cells incubated with complex 1 and loaded with JC-1. A2780 cells were incubated for 40 h with complex 1 at 5 μM concentration. Percentages of cells with high (Q2) and low (Q4) mitochondrial membrane potential, are reported.

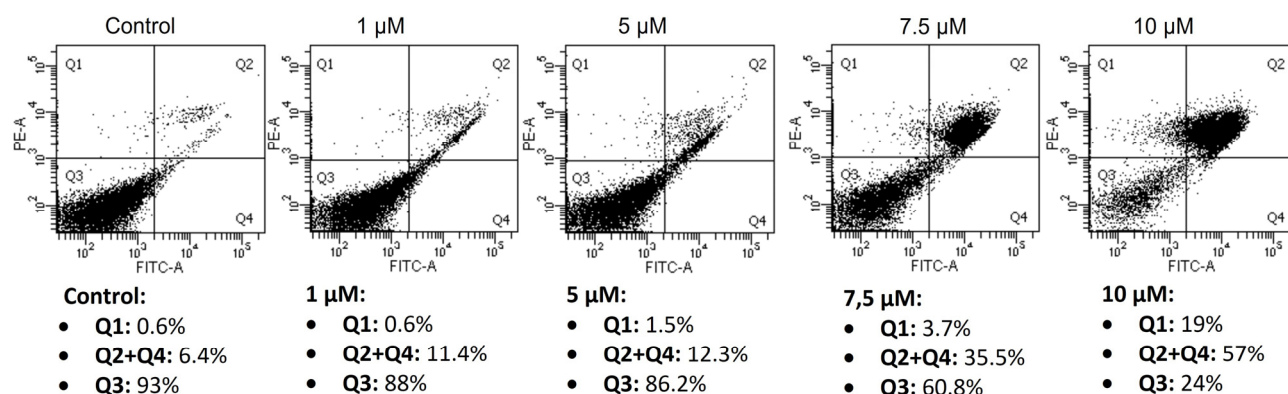

**Figure S12.** Dot plots from a representative experiment of A2780cis cells incubated with complex 1 and loaded with Annexin V-FITC and propidium iodide. A2780cis cells were incubated for 40 h with complex 1 at indicated concentrations. Percentages of viable (Q3), apoptotic (Q2+Q4) and necrotic (Q1) A2780cis are reported.



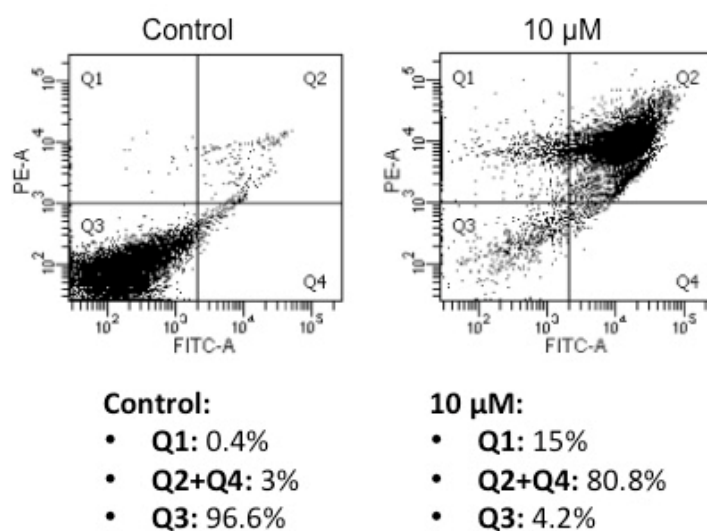

**Figure S13.** Dot plots from a representative experiment of A2780 cells incubated with complex **1** and loaded with Annexin V-FITC and propidium iodide. A2780 cells were incubated for 40 h with complex **1** at 10  $\mu$ M concentration. Percentages of viable (Q3), apoptotic (Q2+Q4) and necrotic (Q1) A2780cis are reported.
